# Supplementary material for: Investigation on converting 1-butene and ethylene into propene via metathesis reaction over W-based catalysts
Source: Royal Society of Chemistry journal article supplement (doi:10.1039/c7ra13776a), 2018-01-01
Supplement: c7ra13776a1.pdf [file c7ra13776a1.pdf]

## Supplementary material

### **Investigation of converting 1-butene and ethylene into propene via metathesis reaction over W-based catalysts**

Guangzheng Zuo, Yuebing Xu, Jiao Zheng, Feng Jiang and Xiaohao Liu\*

*Department of Chemical Engineering, School of Chemical and Material Engineering, Jiangnan University, Wuxi 214122, China*

*E-mail address: [liuxh@jiangnan.edu.cn](mailto:liuxh@jiangnan.edu.cn) (X.H. Liu)*

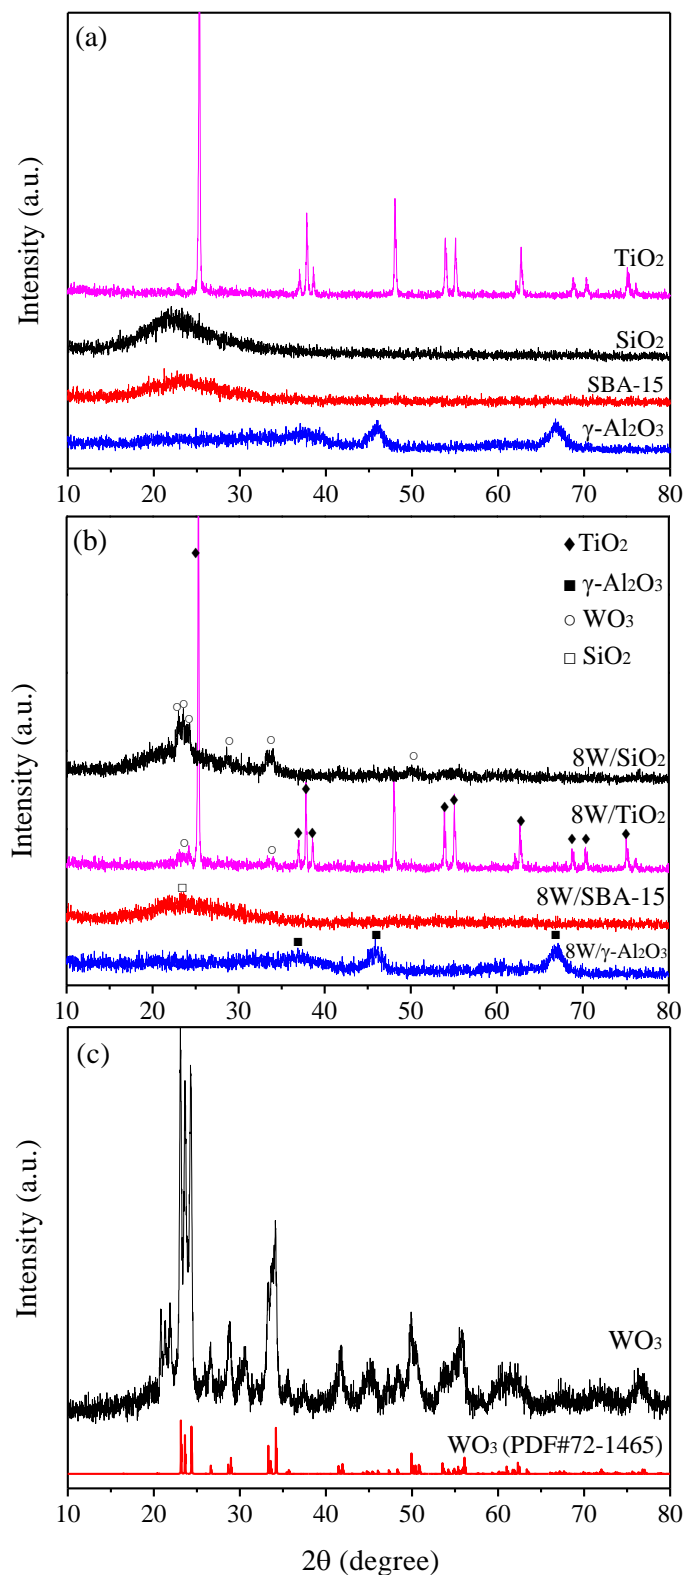

**Fig. S1** XRD patterns of (a) various support materials, (b) their 8 wt% corresponding W-containing catalysts, and (c) unsupported  $\text{WO}_3$  as a reference.

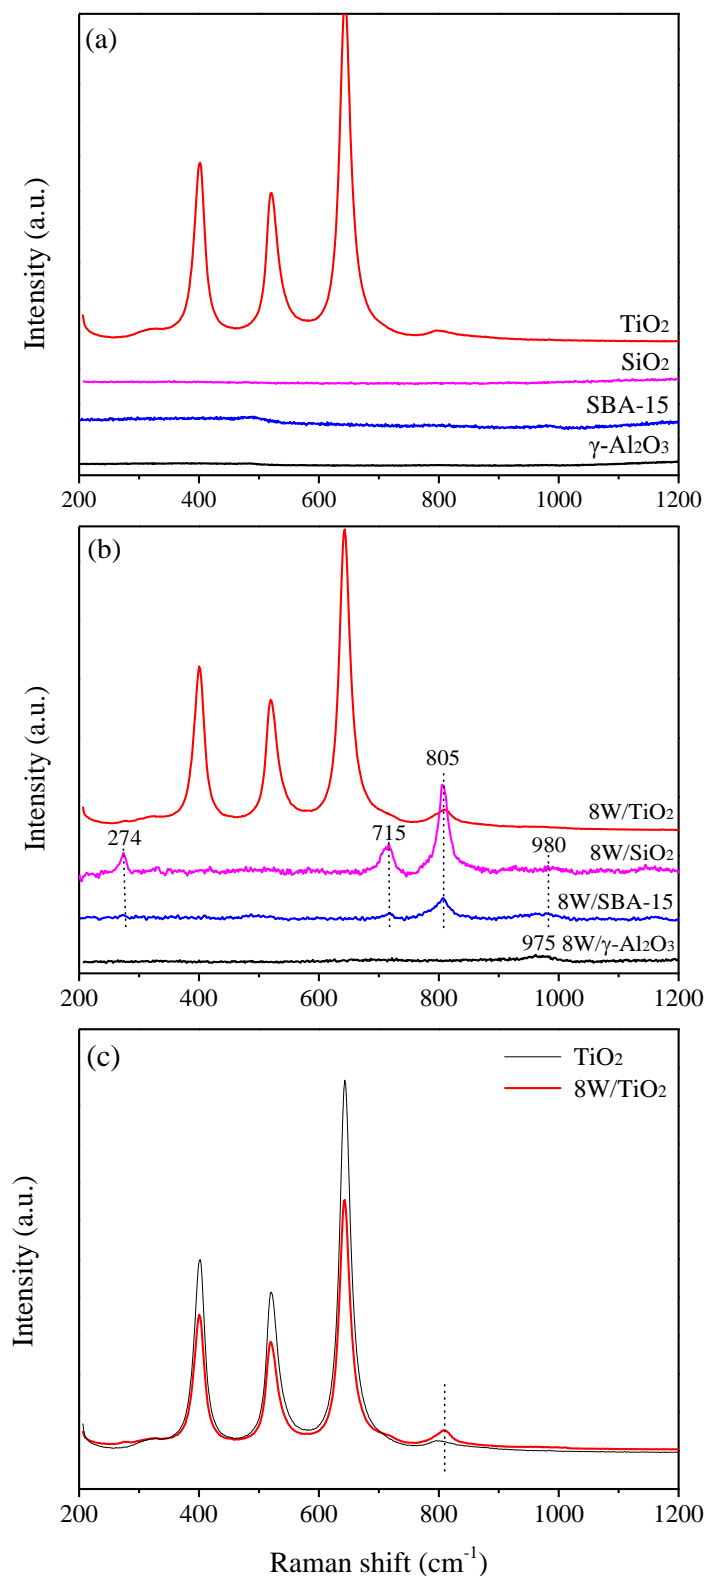

**Fig. S2** Raman spectra of (a) various support materials, (b) their corresponding 8 wt% W-containing catalysts, and (c)  $\text{TiO}_2$  and 8W/ $\text{TiO}_2$ .

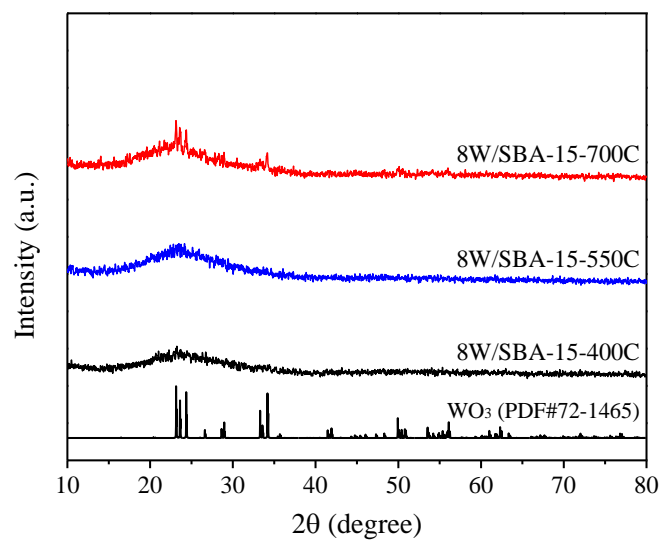

**Fig. S3** XRD patterns of 8W/SBA-15 prepared in different calcination temperatures (400, 550 and 700 °C).

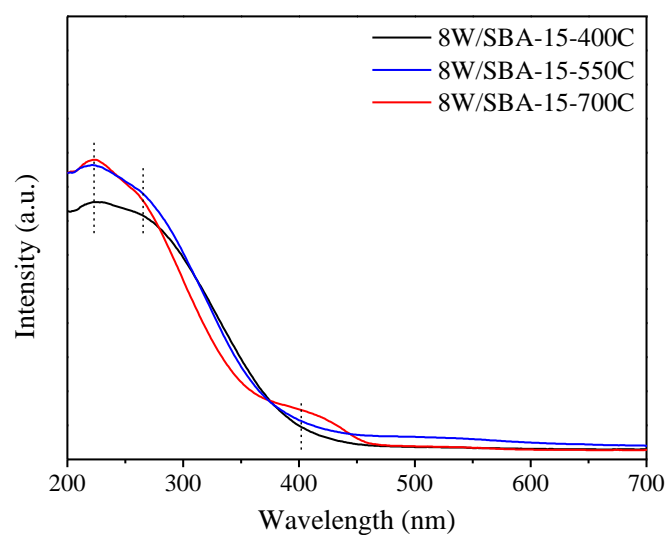

**Fig. S4** UV-vis DRS spectra of 8W/SBA-15 prepared in different calcination temperatures (400, 550, and 700 °C).

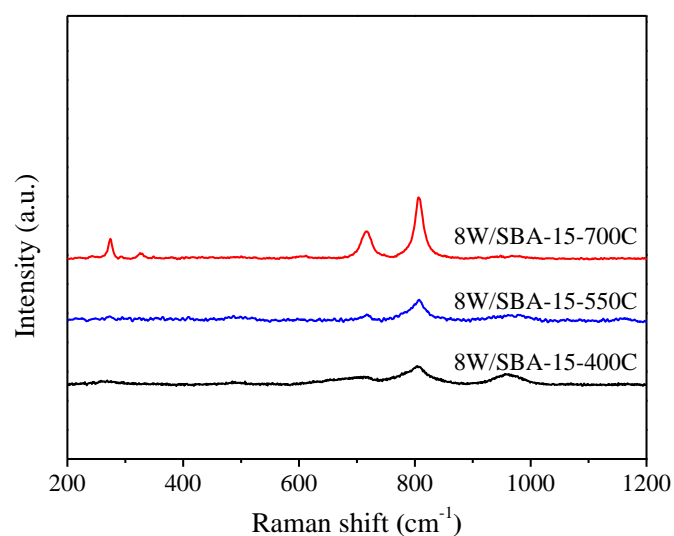

**Fig. S5** Raman spectra of 8W/SBA-15 prepared in different calcination temperatures (400, 550, and 700 °C).

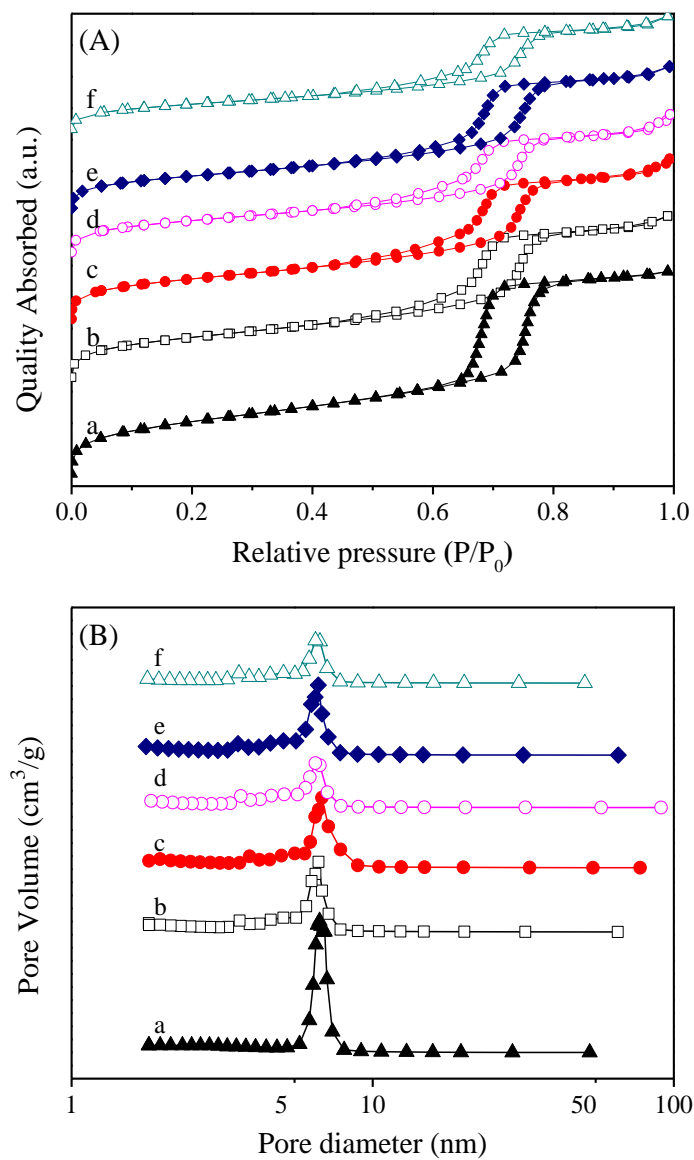

**Fig. S6** (A) Nitrogen adsorption-desorption isotherms and (B) corresponding pore size distribution curves of (a) SBA-15, (b) 4W/SBA-15, (c) 8W/SBA-15, (d) 15W/SBA-15, (e) 20W/SBA-15, and (f) 30W/SBA-15 catalysts.

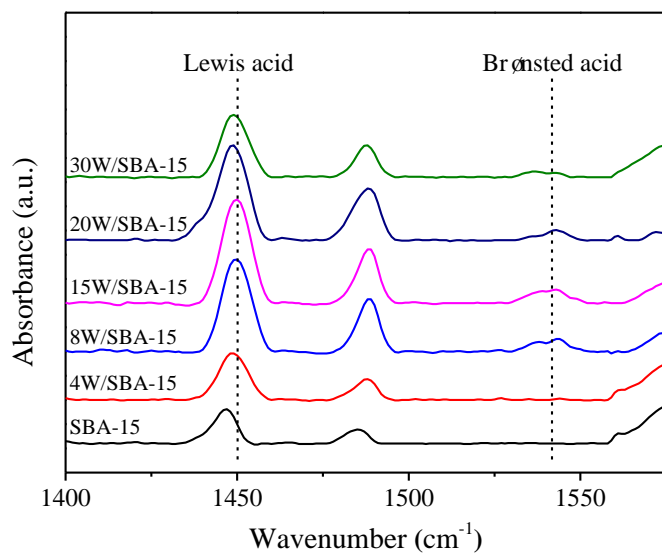

**Fig. S7** FT-IR spectra of pyridine adsorbed SBA-15 and W/SBA-15 catalysts with different W loadings.

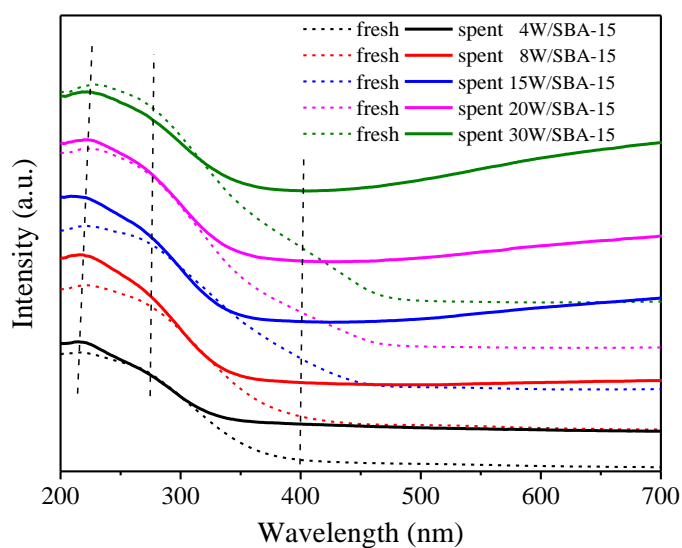

**Fig. S8** UV-vis DRS spectra of fresh W/SBA-15 catalysts with different W loadings and their corresponding spent catalysts.

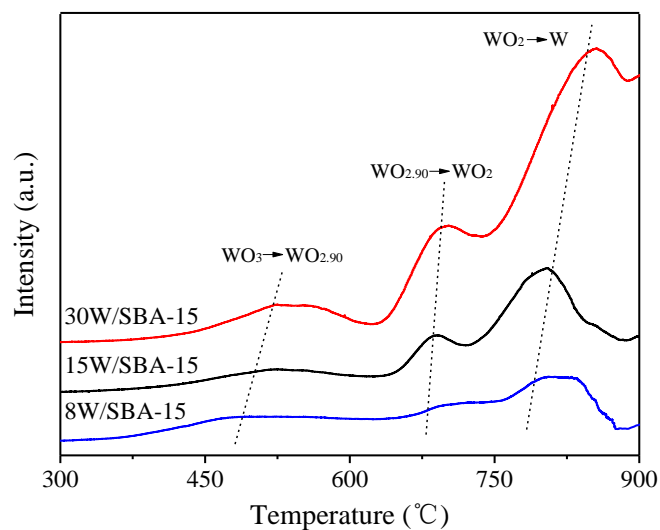

**Fig. S9** H<sub>2</sub>-TPR profiles of fresh 8W/SBA-15, 15W/SBA-15, and 30W/SBA-15 catalysts.

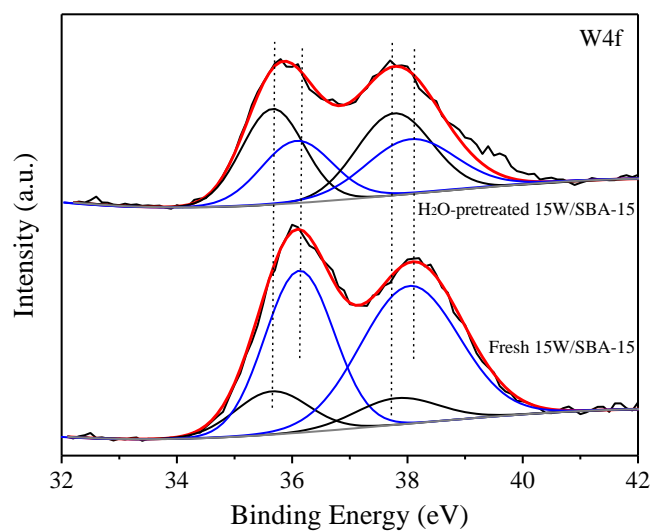

**Fig. S10** XPS spectra of fresh 15W/SBA-15 and H<sub>2</sub>O-pretreated 15W/SBA-15 catalysts.

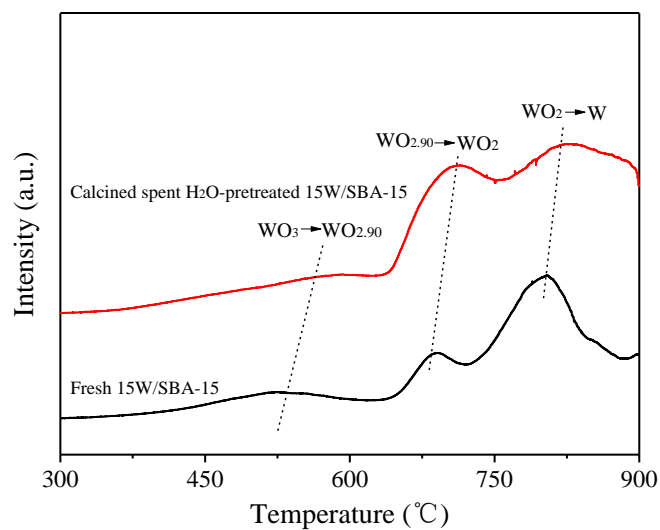

**Fig. S11** H<sub>2</sub>-TPR profiles of fresh 15W/SBA-15 and calcined spent H<sub>2</sub>O-pretreated 15W/SBA-15 catalysts.

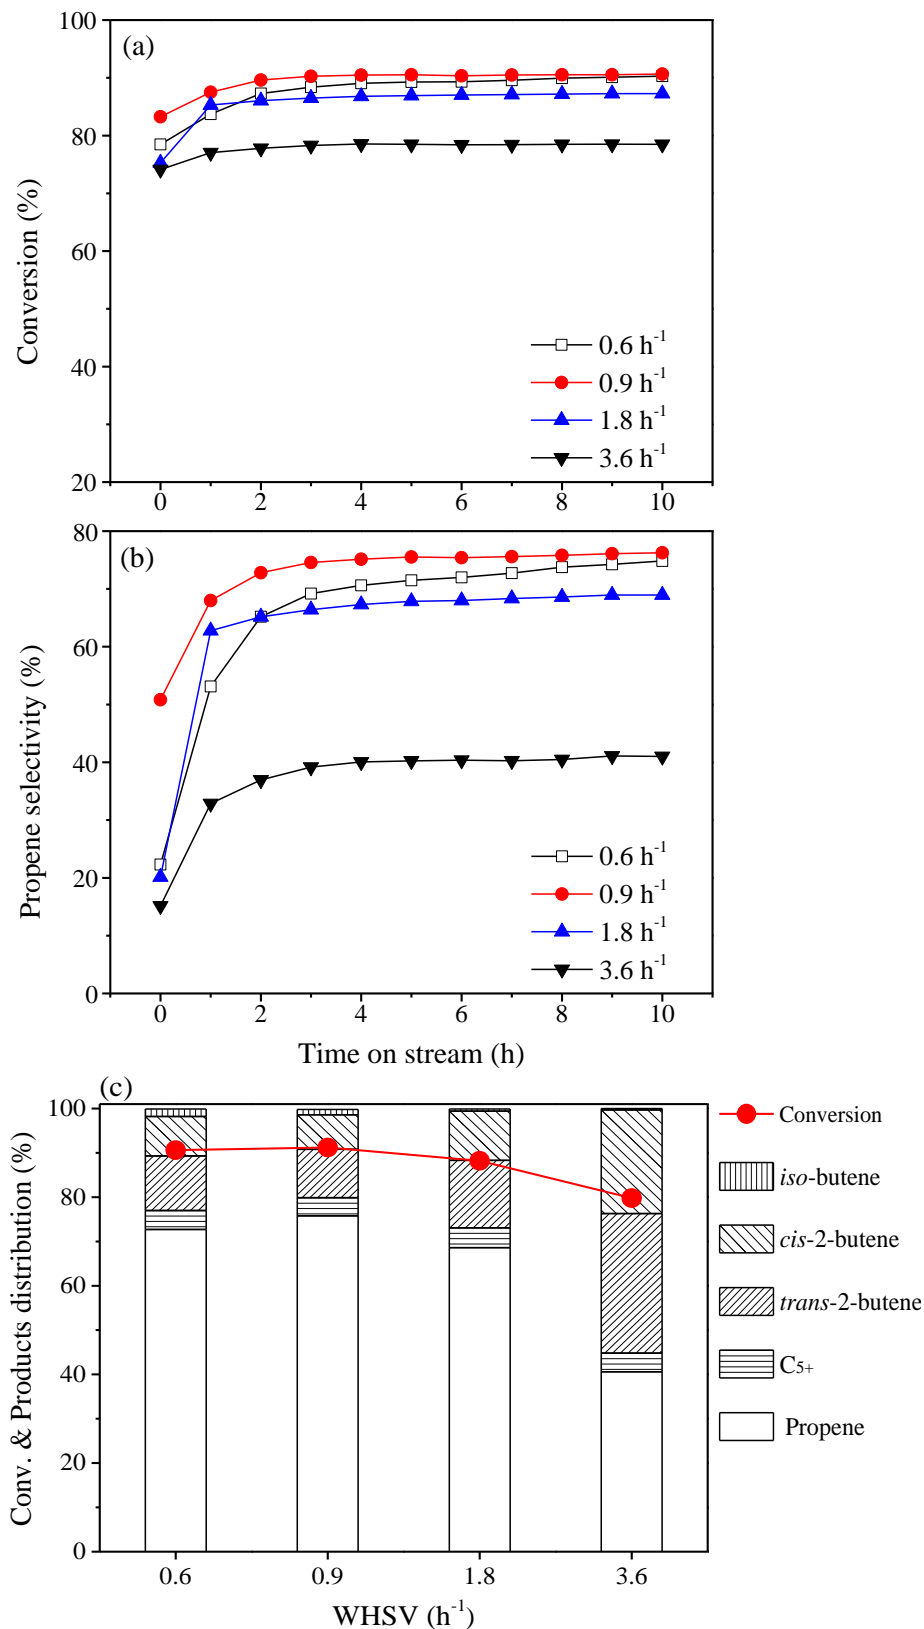

**Fig. S12** Time-dependence of 1-butene conversion (a), propene selectivity (b), and products distribution (c) obtained over 15W/SBA-15 catalyst with different WHSV at the reaction conditions of 450 °C, 0.1 MPa, 1.5, 1.0, 0.5, and 0.25 g of catalyst weight, and an ethylene/1-butene molar ratio of 2.



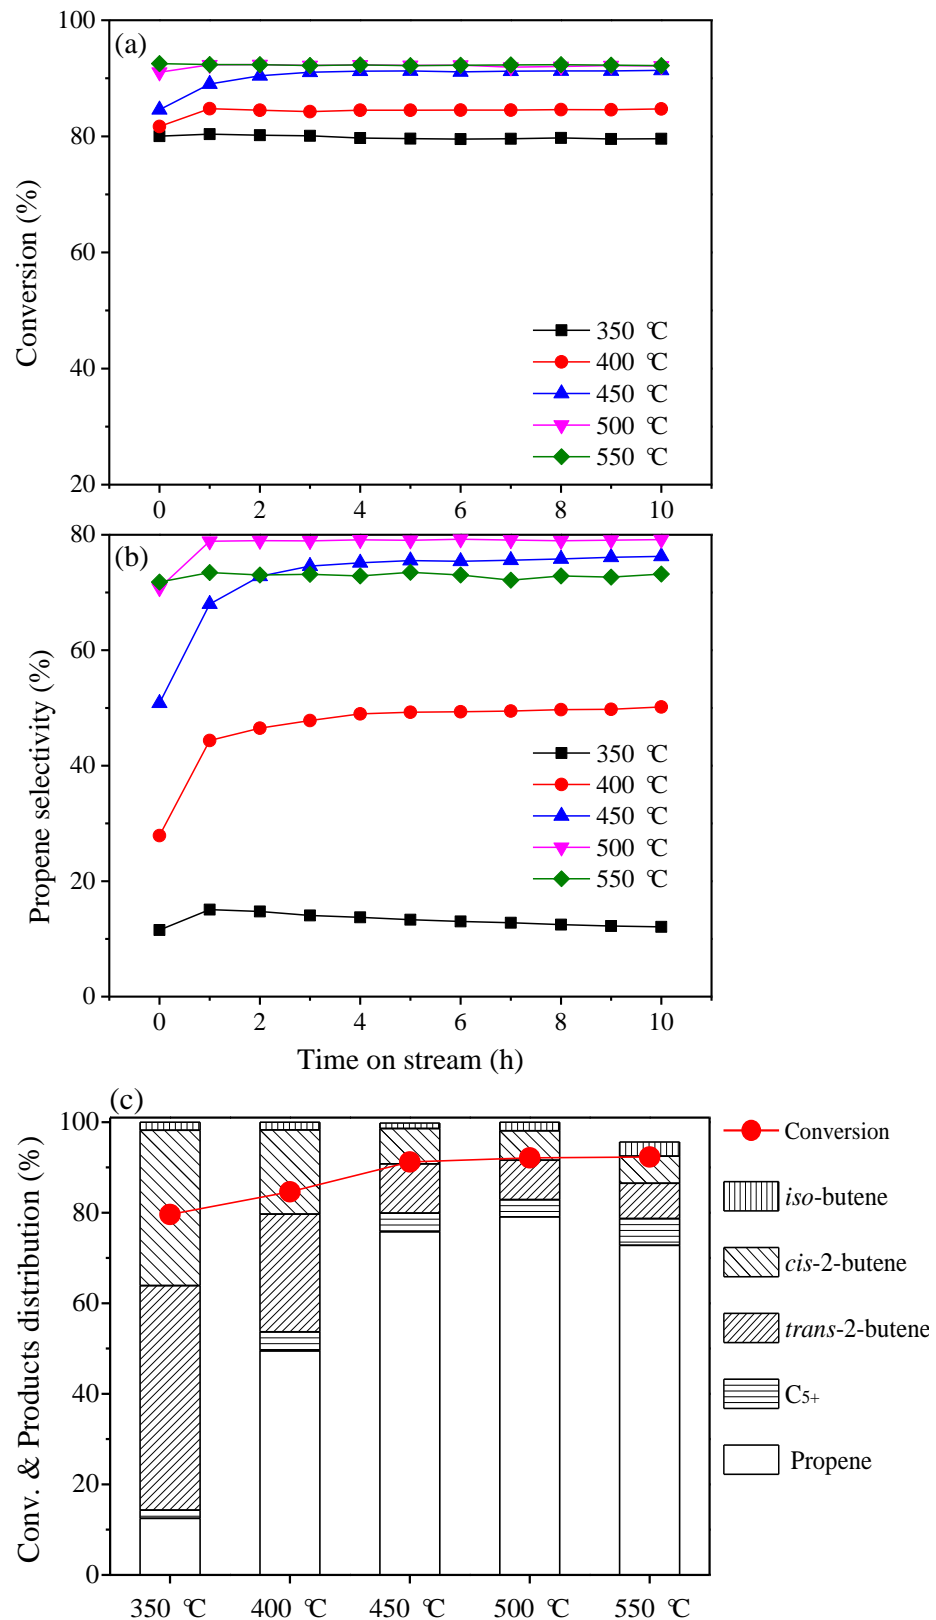

**Fig. S13** Time-dependence of 1-butene conversion (a), propene selectivity (b), and products distribution (c) obtained over 15W/SBA-15 catalyst with different reaction temperatures at the reaction conditions of 0.1 MPa, 1.0 g of catalyst weight, 0.9 h<sup>-1</sup> of WHSV, and an ethylene/1-butene molar ratio of 2.

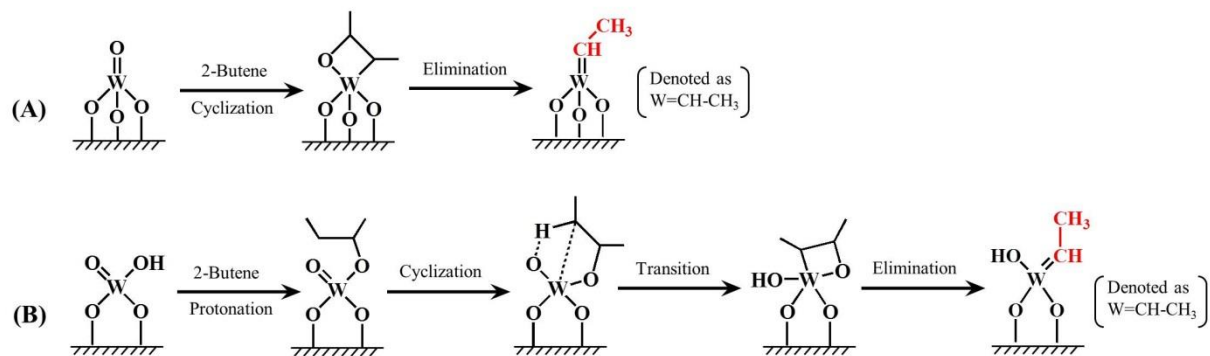

**Scheme S1** Formation pathway of active sites denoted as W-carbene from the terminal  $\text{W}=\text{O}$  (A), and  $\text{W}-\text{OH}$  (B) of isolated tetrahedral  $\text{W}^{5+}$  species.

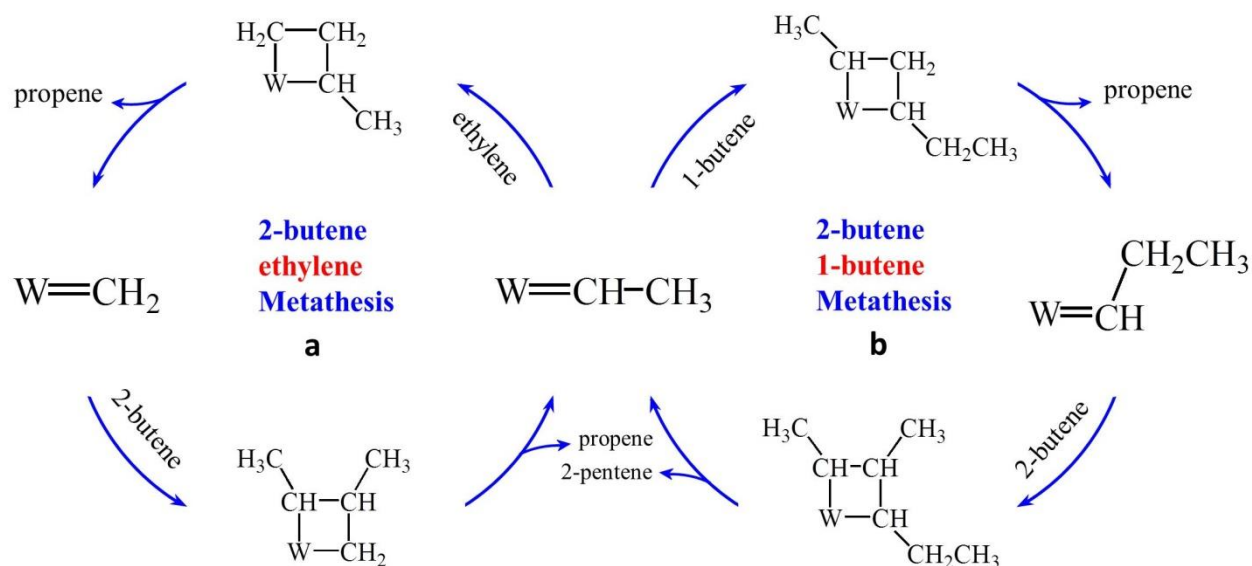

**Scheme S2** Reaction mechanism of the metathesis of 2-butene and ethylene (a), and 2-butene and 1-butene (b) over SBA-15 supported W catalysts.

**Table S1** Physicochemical properties of SBA-15 and W/SBA-15 catalysts with different W loadings.

| Sample                              | Surface area<br>(m <sup>2</sup> g <sup>-1</sup> ) <sup>a</sup> | Pore volume<br>(cm <sup>3</sup> g <sup>-1</sup> ) <sup>b</sup> | Pore size<br>(nm) <sup>b</sup> | Surface density<br>(W nm <sup>-2</sup> ) | Acidity (μmol g <sup>-1</sup> ) |                         |
|-------------------------------------|----------------------------------------------------------------|----------------------------------------------------------------|--------------------------------|------------------------------------------|---------------------------------|-------------------------|
|                                     |                                                                |                                                                |                                |                                          | Brønsted acid <sup>c</sup>      | Lewis acid <sup>c</sup> |
| SiO <sub>2</sub>                    | 287                                                            | 1.05                                                           | 13.0                           | N/A                                      | N/A                             | N/A                     |
| 8W/SiO <sub>2</sub>                 | 247                                                            | 0.87                                                           | 11.8                           | 0.91                                     | 1.1                             | 7.3                     |
| SBA-15                              | 719                                                            | 1.09                                                           | 6.1                            | N/A                                      | 0.0                             | 3.6                     |
| 8W/SBA-15                           | 551                                                            | 0.83                                                           | 5.9                            | 0.41                                     | 2.4                             | 12.0                    |
| γ-Al <sub>2</sub> O <sub>3</sub>    | 209                                                            | 0.42                                                           | 8.1                            | N/A                                      | N/A                             | N/A                     |
| 8W/γ-Al <sub>2</sub> O <sub>3</sub> | 185                                                            | 0.38                                                           | 6.3                            | 1.23                                     | 0.0                             | 47.1                    |
| TiO <sub>2</sub>                    | 13                                                             | 0.06                                                           | 18.9                           | N/A                                      | N/A                             | N/A                     |
| 8W/TiO <sub>2</sub>                 | 8                                                              | 0.03                                                           | 17.7                           | 28.3                                     | 0.0                             | 1.9                     |

<sup>a</sup> Determined by BET method.<sup>b</sup> Evaluated by the BJH method.<sup>c</sup> Determined by pyridine-IR spectra.**Table S2** Catalytic performance of unsupported WO<sub>3</sub> and 8 wt% W-containing catalysts with different support material.

| Catalyst                            | Conversion<br>(%) <sup>a</sup> | Selectivity (%) |                 |                        |                      |                    | Specific activity<br>(mmol C <sub>4</sub> <sup>=</sup> g <sub>cat</sub> <sup>-1</sup> h <sup>-1</sup> ) |
|-------------------------------------|--------------------------------|-----------------|-----------------|------------------------|----------------------|--------------------|---------------------------------------------------------------------------------------------------------|
|                                     |                                | Propene         | C <sub>5+</sub> | <i>trans</i> -2-butene | <i>cis</i> -2-butene | <i>iso</i> -butene |                                                                                                         |
| 8W/SiO <sub>2</sub>                 | 79.5                           | 47.4            | 6.0             | 26.5                   | 20.1                 | 0.1                | 12.8                                                                                                    |
| 8W/γ-Al <sub>2</sub> O <sub>3</sub> | 77.1                           | 13.6            | 2.3             | 42.7                   | 31.4                 | 10.5               | 12.4                                                                                                    |
| 8W/TiO <sub>2</sub>                 | 62.6                           | 1.5             | 0.8             | 56.4                   | 41.1                 | 0.2                | 10.1                                                                                                    |
| 8W/SBA-15                           | 83.3                           | 54.6            | 3.6             | 23.8                   | 17.5                 | 0.5                | 13.4                                                                                                    |
| WO <sub>3</sub>                     | 14.5                           | 0.9             | 1.2             | 62.9                   | 35.4                 | 0.2                | 2.3                                                                                                     |

<sup>a</sup> Reaction conditions: T = 450 °C, P = 0.1 MPa, catalyst weight = 0.5 g, WHSV (E+B) = 1.8 h<sup>-1</sup>, n (E) / n (B) = 2.**Table S3** Catalytic performance of 8W/SBA-15 catalyst prepared at different calcination temperatures.

| T (°C) | Conversion<br>(%) <sup>a</sup> | Selectivity (%) |                 |                        |                      |                    | Specific activity<br>(mmol C <sub>4</sub> <sup>=</sup> g <sub>cat</sub> <sup>-1</sup> h <sup>-1</sup> ) |
|--------|--------------------------------|-----------------|-----------------|------------------------|----------------------|--------------------|---------------------------------------------------------------------------------------------------------|
|        |                                | Propene         | C <sub>5+</sub> | <i>trans</i> -2-butene | <i>cis</i> -2-butene | <i>iso</i> -butene |                                                                                                         |
| 400    | 84.1                           | 54.2            | 4.0             | 23.3                   | 17.1                 | 1.4                | 13.5                                                                                                    |
| 550    | 83.3                           | 54.6            | 3.6             | 23.8                   | 17.5                 | 0.5                | 13.4                                                                                                    |
| 700    | 83.1                           | 55.2            | 4.4             | 23.3                   | 16.9                 | 0.2                | 13.4                                                                                                    |

<sup>a</sup> Reaction conditions: T = 450 °C, P = 0.1 MPa, catalyst weight = 0.5 g, WHSV (E+B) = 1.8 h<sup>-1</sup>, n (E) / n (B) = 2.

**Table S4** Catalytic performance of SBA-15, WO<sub>3</sub>, and W-containing catalysts with different loadings.

| Catalyst        | Conversion (%) <sup>a</sup> | Selectivity (%) |                 |                        |                      |                    | Specific activity (mmol C <sub>4</sub> = g <sub>cat</sub> <sup>-1</sup> h <sup>-1</sup> ) |
|-----------------|-----------------------------|-----------------|-----------------|------------------------|----------------------|--------------------|-------------------------------------------------------------------------------------------|
|                 |                             | Propene         | C <sub>5+</sub> | <i>trans</i> -2-butene | <i>cis</i> -2-butene | <i>iso</i> -butene |                                                                                           |
| SBA-15          | 72.3                        | 2.9             | 0.3             | 55.4                   | 40.8                 | 0.6                | 11.6                                                                                      |
| 4W/SBA-15       | 78.9                        | 37.4            | 2.4             | 34.7                   | 25.3                 | 0.4                | 12.7                                                                                      |
| 8W/SBA-15       | 83.3                        | 54.6            | 3.6             | 23.8                   | 17.5                 | 0.5                | 13.4                                                                                      |
| 15W/SBA-15      | 88.2                        | 68.6            | 4.5             | 15.2                   | 11.1                 | 0.5                | 14.2                                                                                      |
| 20W/SBA-15      | 86.7                        | 63.7            | 4.4             | 18.0                   | 13.2                 | 0.7                | 13.9                                                                                      |
| 30W/SBA-15      | 85.9                        | 61.5            | 4.3             | 19.5                   | 14.1                 | 0.7                | 13.8                                                                                      |
| WO <sub>3</sub> | 14.5                        | 0.9             | 1.2             | 62.9                   | 35.4                 | 0.2                | 2.3                                                                                       |

<sup>a</sup> Reaction conditions: T = 450 °C, P = 0.1 MPa, catalyst weight = 0.5 g, WHSV (E+B) = 1.8 h<sup>-1</sup>, n (E) / n (B) = 2.
